# Supplementary material for: The inhibition of fibril formation of lysozyme by sucrose and trehalose
Source: Royal Society of Chemistry journal article supplement (doi:10.1039/d4ra01171f), 2024-01-01

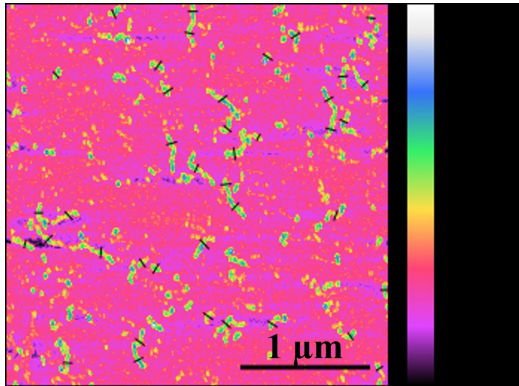

Supplement: d4ra01171f18.pdf [file d4ra01171f18.pdf]
